## Electrophysiologic Mechanisms Responsible for Inotropic Responses to Ketamine in Guinea Pig and Rat Myocardium

Masayuki Endou, M.D.,\* Yuichi Hattori, M.D.,† Haruaki Nakaya, M.D.,‡  
Yasuyuki Gotoh, M.D.,§ Morio Kanno, M.D.¶

Inotropic and electrophysiologic effects of ketamine were investigated in cardiac preparations isolated from guinea pigs and rats. Ketamine produced a concentration-dependent negative inotropic effect in electrically driven guinea pig papillary muscles, an effect that was accompanied by a decrease in action potential duration at the 0-mV level (APD<sub>0</sub>). In contrast, ketamine produced a concentration-dependent positive inotropic effect in rat left atria in the presence of 10<sup>-6</sup> M propranolol. The increase in force of contraction was accompanied by an increase in APD<sub>0</sub>. Experiments using patch clamp techniques revealed that ketamine reduced the transsarcolemmal Ca<sup>2+</sup> current (I<sub>Ca</sub>) as well as the inward rectifier K<sup>+</sup> current and delayed outward K<sup>+</sup> current in guinea pig single ventricular cells. These results indicate that the shortening of APD<sub>0</sub> observed in guinea pig papillary muscles might result from the suppression of I<sub>Ca</sub>. In rat single ventricular cells ketamine reduced the Ca<sup>2+</sup>-insensitive transient outward current (I<sub>to</sub>) and did not enhance I<sub>Ca</sub>, suggesting that the ketamine-induced prolongation of APD<sub>0</sub> observed in rat left atria is due to a decrease in I<sub>to</sub> rather than an increase in I<sub>Ca</sub>. Treatment of rat left atria with the specific Ca<sup>2+</sup>-insensitive I<sub>to</sub> inhibitor 4-aminopyridine (2 mM) produced a positive inotropic effect and prolongation of APD<sub>0</sub>, and these effects were equivalent to those caused by the highest concentration of ketamine. In the presence of 4-aminopyridine, ketamine failed to induce a positive inotropic effect and instead caused a negative inotropic one. In conclusion, the negative and positive inotropic effects of ketamine may result from the suppression of I<sub>Ca</sub> and I<sub>to</sub>, respectively. The inhibitory action on these membrane currents may at least in part explain the species and tissue differences in inotropic responses to ketamine. Key words: Heart: action potential; inotropic effect. Anesthetics, intravenous: ketamine. Species: guinea pig; rat. Ions: calcium; potassium. Pharmacology: 4-Aminopyridine.

KETAMINE possesses a direct negative inotropic effect on a variety of mammalian heart preparations, such as isolated rabbit heart,<sup>1</sup> guinea pig atrium,<sup>2</sup> and canine atrium<sup>3</sup> and ventricle.<sup>4</sup> Ketamine inhibits the maximum rate of rise of slow action potential without affecting a rapid cooling contracture in rabbit papillary muscles,<sup>5</sup> suggesting that inhibition of transsarcolemmal Ca<sup>2+</sup> influx through Ca<sup>2+</sup> channels is in part responsible for the negative inotropic effect of ketamine. In this regard, ketamine appears

to have an action similar to other intravenous and inhalation anesthetics.<sup>6–9</sup> In contrast, Barrigon *et al.* have reported that ketamine causes a direct positive inotropic effect on rat atria, an effect that is accompanied by an increase in action potential duration (APD) and is abolished completely by verapamil, a Ca<sup>2+</sup> channel blocker.<sup>10</sup> From these findings they postulated that ketamine may increase transsarcolemmal Ca<sup>2+</sup> influx in rat atria. However, it remains unanswered as to why ketamine exerts disparate inotropic actions on myocardium of different species.

In this study, we examined the inotropic effects of ketamine on cardiac muscles isolated from guinea pigs and rats. We found that ketamine produces a negative inotropic effect in guinea pig papillary muscle and, as reported by Barrigon *et al.*,<sup>10</sup> a positive inotropic effect in rat left atrium. Because changes in APD were opposite in these cardiac tissues—a shortening of APD in guinea pig papillary muscles and a prolongation in rat atria—we examined effects of ketamine on membrane current system in isolated ventricular cells of guinea pigs and rats using patch clamp techniques.

### Materials and Methods

#### MEASUREMENT OF FORCE OF CONTRACTION

This study was approved by the Hokkaido University School of Medicine Animal Care and Use Committee. Guinea pigs of either sex weighing 250–400 g were killed by a blow on the head, and male Wistar rats weighing 200–400 g were anesthetized with diethyl ether. Then, the hearts were excised rapidly and transferred to a dissection bath filled with oxygenated Krebs-Henseleit solution (pH 7.4) at room temperature. The solution was of the following composition (millimolar concentrations): Na<sup>+</sup> 143.9, K<sup>+</sup> 6.0, Ca<sup>2+</sup> 1.8, Mg<sup>2+</sup> 1.2, Cl<sup>-</sup> 127.4, SO<sub>4</sub><sup>2-</sup> 1.2, H<sub>2</sub>PO<sub>4</sub><sup>-</sup> 1.2, HCO<sub>3</sub><sup>-</sup> 24.9, and glucose 10.0. The right ventricular papillary muscle of guinea pig, left ventricular papillary muscle of rat, and left atrium of each species were dissected carefully.

The papillary muscle, less than 1 mm in diameter, was mounted vertically in a 10-ml water-jacketed bath containing Krebs-Henseleit solution bubbled with 95% O<sub>2</sub> and 5% CO<sub>2</sub> at 30° C. The lower end of the papillary muscle was fixed on a hook, and the other end was connected by a silk thread to a force transducer (Nihon Koh-

\* Postdoctoral Fellow.

† Research Assistant Professor.

‡ Associate Professor.

§ Visiting Scientist.

¶ Professor.

Received from the Department of Pharmacology, Hokkaido University School of Medicine, Sapporo, Japan. Accepted for publication November 1, 1991. This work was supported in part by a Grant-in-Aid from the Ministry of Education, Science and Culture of Japan to M.K.

Address reprint requests to Dr. Endou: Department of Pharmacology, Hokkaido University School of Medicine, Sapporo 060, Japan.

den, TB-612T). Isometric tension developed in the preparation was recorded on a pen recorder (Nihon Kohden, RJG-3026) through a preamplifier (Nihon Kohden, RP-5). The resting tension applied to the preparation was adjusted to 0.5 g. The papillary muscle was paced electrically by rectangular pulses 0.5 Hz in frequency, 5 ms in duration and two times the threshold voltage, delivered by a pair of spiral platinum electrodes connected to an electric stimulator (Sanei Sokki, 3F46) through an isolation unit (Sanei Sokki, 5361).

The left atrium was mounted vertically in a water-jacketed bath containing 50 ml of Krebs-Henseleit solution bubbled with 95% O<sub>2</sub> and 5% CO<sub>2</sub> at a temperature of 30°C. The lower end of the preparation was pinned on a pair of hook electrodes for stimulation, and the other was connected by a silk thread to a force transducer (Nihon Kohden, TB-612T). The muscle was stimulated electrically and the isometric developed tension was recorded as described for the papillary muscle except that the resting tension applied to the preparation was adjusted to 1.0 g and the rectangular pulse was 1 ms in duration.

The atria and the papillary muscles were equilibrated for 75 min and 120 min before starting the experiments, respectively. The concentration-response curves for the inotropic effect of ketamine were determined in a cumulative manner by increasing its concentration in steps of 0.5 log unit. In a series of experiments to examine the influence of 4-aminopyridine (4-AP) on the inotropic effect of ketamine, ketamine was applied cumulatively about 30 min after the administration of 2 mM 4-AP, when an increase in the force of contraction by 4-AP reached a steady level. When prazosin was used, it was added to the bath 30 min before the administration of ketamine. All of the experiments were carried out in the presence of propranolol (10<sup>-6</sup> M) to eliminate the possibility that endogenous norepinephrine released by ketamine might modify the direct inotropic effect of ketamine.<sup>3</sup>

#### MEASUREMENT OF ACTION POTENTIAL

The left atrial strips and papillary muscles of guinea pig and rat were placed in a 5-ml tissue bath and superfused at a rate of 10 ml/min with Krebs-Henseleit solution. The solution was gassed with 95% O<sub>2</sub> and 5% CO<sub>2</sub>, and the temperature was kept at 30°C. One end of the preparation was hooked to an extension of the lever arm of a force transducer (Nihon Kohden, TB-651T), and the other end was pinned to the bottom of the tissue chamber. The transducer was mounted on a micromanipulator, and resting tension applied to the preparation was adjusted to 200 mg.

The preparations were stimulated at a rate of 0.5 Hz through platinum field electrodes. Stimuli were rectangular pulses of 1-ms duration at twice the threshold volt-

age, delivered from an electronic stimulator (Nihon Kohden, SEN-3101) through an isolation unit (Nihon Kohden, SS-101J). Transmembrane potentials were recorded using glass microelectrodes filled with 3 M KCl (resistance of 10–20 MΩ). The microelectrode was coupled *via* an Ag/AgCl junction to a high-impedance capacitance neutralizing amplifier (Nihon Kohden, MEZ-8201). An agar bridge containing 3 M KCl was used as a reference electrode. An electronic differentiator whose output was linear from 50 to 1,000 V/s was used for measuring the maximum rate of rise of action potentials. These amplified signals were displayed on an oscilloscope (Nihon Kohden, VC-10), photographed on 35-mm film, and recorded on a chart recorder (Watanabe Sokki, WR-3101). The preparations were equilibrated for at least 120 min before the commencement of the experiments. The experiments studying the effects of ketamine were carried out in the presence of propranolol (10<sup>-6</sup> M). Only the results from the experiments in which a stable impalement was maintained are presented here.

#### MEASUREMENT OF MEMBRANE CURRENTS

Single ventricular cells of guinea pig and rat hearts were obtained, as described previously.<sup>11</sup> In an anesthetized animal whose lungs were being mechanically ventilated, the heart was quickly excised and cannulated by a Langendorff apparatus. The heart was perfused with a normal HEPES-Tyrode solution (36°C) until the rate of beating became stable (about 5 min). Then, the perfusate was changed to a nominally Ca<sup>2+</sup>-free Tyrode solution for 5 min, resulting in the cessation of the heart's beating. The quiescent heart was perfused with the solution containing 0.04% (weight/volume) collagenase (type 1, Sigma, St. Louis, MO) for 5–10 min in guinea pig hearts and for 20 min in rat hearts.

After the digestion by collagenase, a Kraftbrühe solution<sup>12</sup> was used to wash the collagenase solution off, and the ventricular tissue was cut into small pieces. The cell suspension in the Kraftbrühe solution was filtered through a 100-μm pore stainless steel mesh and stored in a refrigerator (4°C) for later use. The normal HEPES-Tyrode solution was of the following composition (millimolar concentrations): Na<sup>+</sup> 143.33, K<sup>+</sup> 5.4, Ca<sup>2+</sup> 1.8, Mg<sup>2+</sup> 0.5, Cl<sup>-</sup> 153, H<sub>2</sub>PO<sub>4</sub><sup>-</sup> 0.33, glucose 5.5, and HEPES-NaOH buffer (pH 7.4) 5.0. The Kraftbrühe solution was of the following composition (millimolar concentrations): K<sup>+</sup> 130, Mg<sup>2+</sup> 3, Cl<sup>-</sup> 46, H<sub>2</sub>PO<sub>4</sub><sup>-</sup> 20, L-glutamic acid 50, taurine 20, glucose 10, EGTA 0.5, and HEPES-KOH buffer (pH 7.4) 10. The internal solution, in the recording pipette, was of the following composition (millimolar concentrations): K<sup>+</sup> 150, Mg<sup>2+</sup> 1.0, Cl<sup>-</sup> 22, aspartate 110, ATP 5.0, phosphocreatine 5.0, EGTA 0.5–1.0, and HEPES-KOH buffer (pH 7.4) 5.0.

Single ventricular cells were placed in the recording chamber (1-ml volume) attached to an inverted microscope (Olympus, IMT-2), and superfused with a HEPES-Tyrode solution at a rate of 4–6 ml/min. The temperature of the external solution was kept at 36° C. The whole-cell membrane currents were recorded by the patch clamp method,<sup>13</sup> using glass patch electrodes with a tip diameter of 4–5  $\mu$ m and a resistance of 1.5–2.5 M $\Omega$ . The tip of the electrode, filled with the internal solution, was attached to cell surface membrane using a micromanipulator (Leitz), and negative pressure (20–30 cmH<sub>2</sub>O) was applied to the electrode. After the giga-sealing between the tip and the membrane was established, the membrane patch was disrupted by applying more negative pressure to make the whole-cell voltage-clamp mode. The electrode was connected to an input of a current–voltage converter with a feedback resistor of 100 M $\Omega$ .

The signals were displayed on a storage oscilloscope (Tektronix, 5113 OP03) and were simultaneously fed to a data recording system consisting of a video cassette recorder (National, NV-F1) and a PCM converter system (Sony, PCM-501ES) as a backup. The current and voltage signals were filtered at 2 KHz, digitized by an analog–digital converter (Canoopus Electronics, ADX-98) at 2 KHz and stored in the 20-Mb hard disk of a personal computer (NEC, PC-98XA) for later analysis. A liquid junction potential between the internal solution and the bath solution of –7 mV was corrected.

## DRUGS

The following compounds were used: ketamine hydrochloride (kindly given by Warner Lambert, Tokyo, Japan), DL-propranolol hydrochloride (Sigma), prazosin hydrochloride (Taito-Pfizer, Tokyo, Japan), 4-aminopyridine (Wako Pure Chemical Industries, Osaka, Japan), and pinacidil (Shionogi, Osaka, Japan). All drugs except pinacidil were dissolved in distilled water. Pinacidil was dissolved 0.1 N HCl.

## STATISTICS

All values are presented in terms of means  $\pm$  SE. Analysis by Student's *t* test was performed for paired or unpaired observations. Comparisons of variables obtained during the dose–response curves with baseline were made by one-way analysis of variance. When an overall statistical significance was found, modified *t* tests were used to compare an intervention with the control value. *P* < 0.05 was considered significant.

## Results

### INOTROPIC EFFECTS OF KETAMINE IN GUINEA PIG PAPILLARY MUSCLE AND RAT LEFT ATRIUM

Figure 1 (top) depicts representative inotropic responses of electrically driven guinea pig papillary muscle and rat left atrium to ketamine at a concentration of 3

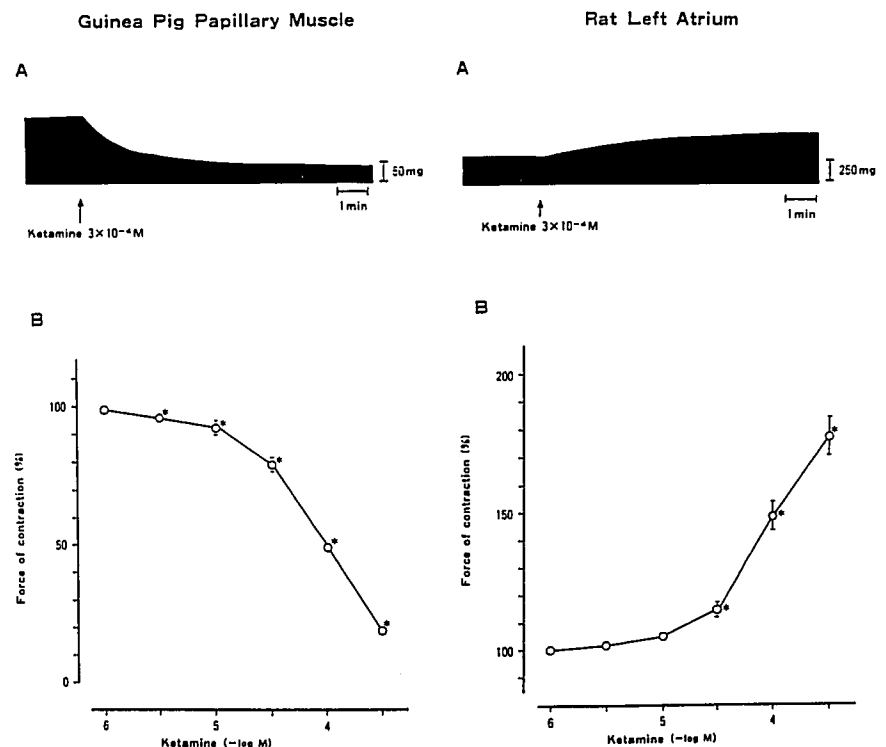

FIG. 1. Effects of ketamine on the force of contraction in guinea pig papillary muscle (left) and rat left atrium (right). A: Typical effect of ketamine at a concentration of  $3 \times 10^{-4}$  M. B: Concentration-dependent inotropic effects of ketamine. Values after the administration of ketamine were expressed in percentage of predrug control values taken as 100%. Points are means  $\pm$  SE of six preparations. \**P* < 0.05 versus the respective control values.

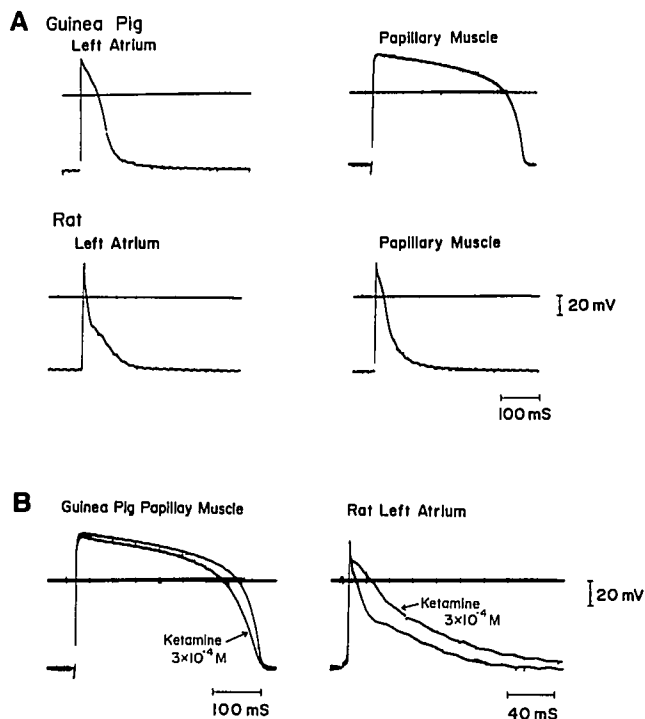

FIG. 2. A: Representative action potential configurations of left atrium and papillary muscle of guinea pig and rat, electrically driven at 0.5 Hz. B: Effects of ketamine at a concentration of  $3 \times 10^{-4}$  M on action potentials of guinea pig papillary muscle and rat left atrium. The horizontal line indicates a 0-mV level.

$\times 10^{-4}$  M. Ketamine produced a negative inotropic effect in a concentration-dependent manner in guinea pig papillary muscles (fig. 1, left). Ketamine at  $3 \times 10^{-4}$  M decreased the force of contraction to  $19.0 \pm 1.0\%$  of the basal level ( $n = 6$ ). In marked contrast, ketamine increased the force of contraction of rat left atria in a concentration-dependent manner (fig. 1, right). The maximum level of the force of contraction obtained at  $3 \times 10^{-4}$  M was  $178 \pm 7\%$  of the basal value ( $n = 6$ ). In concentrations greater than  $3 \times 10^{-4}$  M, ketamine decreased the force of contraction (data not shown). The positive inotropic effect of ketamine observed in rat left atria was not affected by an  $\alpha_1$ -adrenoceptor antagonist, prazosin ( $10^{-7}$  M). The onset of both inotropic responses to ketamine was rapid, and the force of contraction returned to its basal level after the drug was washed out.

#### ELECTROPHYSIOLOGIC EFFECTS OF KETAMINE

In order to clarify the mechanisms of the negative and positive inotropic effects of ketamine, we examined the effects of ketamine on action potentials of guinea pig papillary muscle and rat left atrium. It is noteworthy that action potential configurations of both tissues are quite different from each other, as shown in figure 2A. The

action potential configuration of guinea pig papillary muscle is characterized by lack of an early repolarization phase and a very long plateau phase at positive potentials. On the other hand, the APD at the level of 0 mV (APD<sub>0</sub>) in rat left atrium is very short.

The plateau phase of the action potential is maintained by a fine balance between inward and outward currents.<sup>14</sup> Inward currents produce depolarization, whereas outward currents contribute to repolarization of the cells. It is well known that  $\text{Ca}^{2+}$  current flowing through voltage-dependent  $\text{Ca}^{2+}$  channels ( $I_{\text{Ca}}$ ) is the main inward current flow during the plateau phase.<sup>14</sup> Recently, however, the  $\text{Ca}^{2+}$ -insensitive transient outward current ( $I_{\text{to}}$ ) has been reported to be responsible for the early repolarization phase of action potential and to participate dominantly in the determination of the plateau duration in both atrial and ventricular cells in various species, including rat ventricular myocardium.<sup>15-18</sup> Judging by the above information, the rapid repolarization phase of rat left atrium seems to be due to in part, if not all, to the flow of  $\text{Ca}^{2+}$ -insensitive  $I_{\text{to}}$ , although the existence of this current in rat atrial cells has not been demonstrated. However, this speculation was supported by the finding that the specific  $\text{Ca}^{2+}$ -insensitive  $I_{\text{to}}$  inhibitor 4-AP markedly prolonged the APD in rat left atria, as it did in rat papillary muscles. The APD<sub>0</sub> levels in rat left atria and papillary muscle were prolonged by  $10.0 \pm 2.1$  ms ( $n = 4$ ) and  $14.0 \pm 1.3$  ms ( $n = 4$ ), respectively by 4-AP at 2 mM.

In both guinea pig papillary muscles and rat left atria, ketamine at a concentration of  $3 \times 10^{-4}$  M produced a depolarization of the resting membrane and decreased the amplitude and the maximum rate of rise of action potentials (table 1). However, as shown in figure 2B, ketamine shortened APD in guinea pig papillary muscle, whereas it prolonged APD in rat left atrium: APD<sub>0</sub> was decreased by about 44 ms in the former and increased by about 8 ms in the latter by ketamine at  $3 \times 10^{-4}$  M. Because changes in APD about the 0-mV level profoundly affect the magnitude of force of contraction,<sup>19,20</sup> it seems likely that the opposite directional changes in APD in guinea pig papillary muscles and rat left atria may be responsible for the negative and positive inotropic effects of ketamine in the respective tissues. Indeed, in rat atria, the time course of the increase in the force of contraction induced by ketamine is parallel with that of the prolongation of APD<sub>0</sub> (fig. 3).

In order to clarify the underlying mechanisms responsible for the ketamine-induced changes in action potential configuration, we examined the effect of ketamine on the transmembrane ionic currents using patch clamp techniques. Figure 4A shows the effects of ketamine on the currents elicited by a 300-ms test pulse from a holding potential of  $-37$  mV to various potentials in a guinea pig ventricular cell, and the current-voltage relationship in

TABLE 1. Effects of  $3 \times 10^{-4}$  M Ketamine on Action Potential Parameters

|               | RMP (mv)     | APA (mv)     | APD <sub>0</sub> (ms) | APD <sub>-40</sub> (ms) | APD <sub>-70</sub> (ms) | $\dot{V}_{\max}$ (V/s) |
|---------------|--------------|--------------|-----------------------|-------------------------|-------------------------|------------------------|
| Rat LA        |              |              |                       |                         |                         |                        |
| Control       | -79.3 ± 1.4  | 110.3 ± 1.7  | 6.6 ± 1.0             | 43.0 ± 2.4              | 119.5 ± 3.3             | 186 ± 12               |
| Ketamine      | -76.5 ± 1.0* | 94.8 ± 0.4*  | 14.9 ± 1.3*           | 68.3 ± 0.9*             | 176.5 ± 3.0*            | 114 ± 11*              |
| Rat PM        |              |              |                       |                         |                         |                        |
| Control       | -80.5 ± 1.3  | 117.3 ± 2.6  | 19.3 ± 4.0            | 35.0 ± 4.4              | 82.0 ± 13.2             | 197 ± 4                |
| Ketamine      | -78.0 ± 1.4* | 108.0 ± 2.0* | 29.8 ± 5.6*           | 59.8 ± 7.6*             | 172.0 ± 21.0*           | 141 ± 4*               |
| Guinea pig LA |              |              |                       |                         |                         |                        |
| Control       | -80.3 ± 0.6  | 116.5 ± 2.5  | 36.9 ± 5.0            | 64.0 ± 5.9              | 107.8 ± 1.5             | 139 ± 11               |
| Ketamine      | -79.0 ± 0.7* | 108.3 ± 2.6* | 49.0 ± 6.4*           | 91.8 ± 10.2*            | 171.8 ± 11.1*           | 107 ± 14*              |
| Guinea pig PM |              |              |                       |                         |                         |                        |
| Control       | -82.3 ± 1.1  | 127.0 ± 1.5  | 340.0 ± 2.7           | 384.4 ± 4.1             | 396.3 ± 6.4             | 154 ± 26               |
| Ketamine      | -80.5 ± 1.1* | 121.5 ± 1.4* | 296.3 ± 3.7*          | 363.8 ± 4.0*            | 390.0 ± 4.0             | 117 ± 23*              |

Values are means ± SE of four experiments in each tissue.

RMP = resting membrane potential; APA = action potential amplitude; APD<sub>0</sub>, APD<sub>-40</sub>, and APD<sub>-70</sub> = action potential duration at 0, -40, and -70 mV, respectively;  $\dot{V}_{\max}$  = maximum rate of rise; LA = left atria; PM = papillary muscles.

\* Significantly different compared to respective control values.

this cell is depicted in figure 4B. As illustrated clearly, the peak inward current elicited by test pulses ranging from -17 to +32 mV, namely  $I_{Ca}$ , was decreased by ketamine in a concentration-dependent manner. The current amplitude elicited by a test pulse to +2 mV, which was defined by subtraction of the late current at the end of the step pulse from the initial peak inward current, was decreased to  $69.1 \pm 3.6\%$  of control amplitude by ketamine at  $10^{-4}$  M in seven cells. The current-voltage relationship also revealed that ketamine inhibited the inward rectifier  $K^+$  current ( $I_{Krect}$ ) and the delayed outward  $K^+$  current ( $I_K$ ). On hyperpolarization to -47 mV,  $I_{Krect}$  almost reached its maximum value in the outward direction, and ketamine at  $10^{-4}$  M decreased this current at -47 mV to  $46.7 \pm 3.4\%$  of the control amplitude ( $n = 5$ ). The amplitude of  $I_K$  at +42 mV, defined by subtraction of the initial current from the late current at the end of the clamp pulse, was also decreased to  $48.5 \pm 4.0\%$  of control ( $n = 5$ ). These findings indicate that the ketamine-induced shortening of APD<sub>0</sub> observed in guinea pig papillary muscles derives mainly from the suppression of  $I_{Ca}$ .

Concerning the prolongation of the plateau phase of action potential, a decrease in outward currents and/or an increase in inward currents could result in the APD prolongation. Since ketamine did not increase  $I_{Ca}$  in rat ventricular cells as mentioned below, a decrease in outward current(s) may provide favorable explanation for the prolongation of APD<sub>0</sub> in rat atria. Accordingly, we examined the effect of ketamine on  $Ca^{2+}$ -insensitive  $I_{to}$ , which is one of the dominant determinants of the plateau duration as mentioned above. In this experiment, we used rat single ventricular cells instead of atrial cells, because of the ease in obtaining single ventricular myocyte. In order to isolate  $I_{to}$ ,  $I_{Ca}$  was blocked by means of adding 2 mM  $Ca^{2+}$  to the external solution.

Figure 5A illustrates changes in actual traces of  $I_{to}$  in a cell exposed to  $10^{-4}$  M ketamine. A holding potential

was kept at -67 mV and test pulses of 300 ms were given in 10 mV steps from -17 to +53 mV. A current-voltage relationship in the same cell is illustrated in figure 5B.  $I_{to}$  was activated at potential above -17 mV, and at every potential at which  $I_{to}$  was activated, ketamine decreased the peak current of  $I_{to}$  with relatively little effect on the current level at the end of the test pulses. Ketamine suppressed  $I_{to}$  in a concentration-dependent manner. The current amplitude defined by subtraction of the late current at the end of the test pulse from the initial peak outward current elicited by a test pulse to +32 mV was decreased to  $57.5 \pm 7.9$  and  $35.6 \pm 5.6\%$  of control after the application of ketamine at  $10^{-4}$  M and  $3 \times 10^{-4}$  M, respectively ( $n = 5$ ). In addition, it is worth mentioning that the holding outward current at -67 mV was sup-

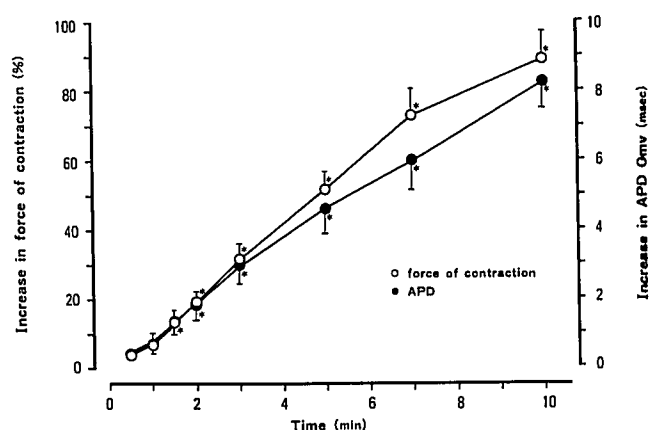

FIG. 3. Time course of changes in force of contraction (O) and action potential duration at 0 mV (●) produced by ketamine at  $3 \times 10^{-4}$  M in rat left atria (mean ± SE;  $n = 4$ ). Left ordinate: net increase in force of contraction expressed as percentages of the predrug values. Right ordinate: net increase in action potential duration at 0 mV expressed as absolute values (milliseconds). \* $P < 0.05$  versus the respective baseline values.

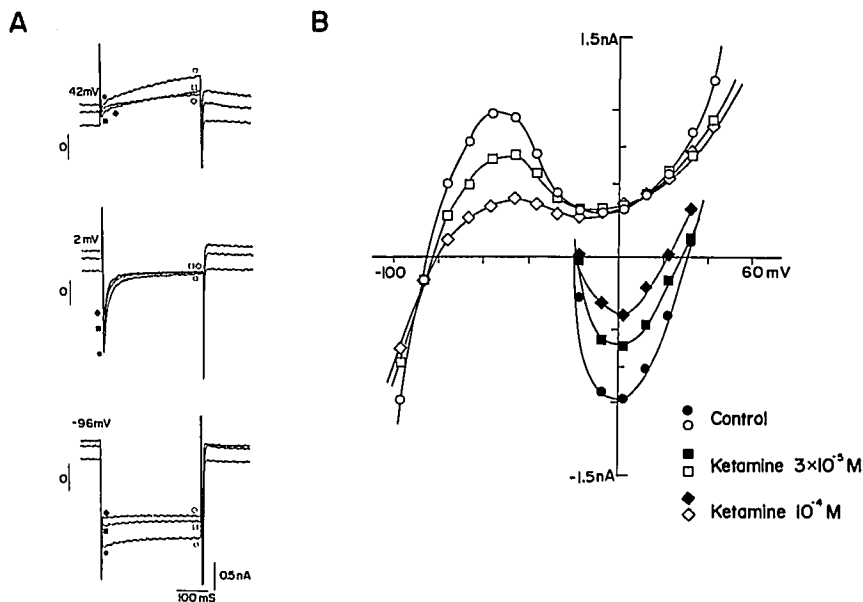

FIG. 4. Effect of ketamine on membrane currents elicited by clamp pulses of 300-ms duration from a holding potential of  $-37$  mV in a guinea pig single ventricular cell. A: Typical current traces elicited by voltage-clamp pulses to  $+42$ ,  $+2$ , and  $-96$  mV. The peak current (●, ■, ◆) and steady current at the end of the pulse (○, □, ◇) in the absence and the presence of ketamine ( $3 \times 10^{-5}$  M,  $10^{-4}$  M), respectively, were measured, and current-voltage relationships are depicted in B.

pressed by ketamine (fig. 5A), indicating its suppressing effect on  $I_{K_{rect}}$  in rat ventricular cells as in guinea pig ventricular cells.

We also confirmed the effect of ketamine on  $I_{Ca}$  in rat ventricular cells in another set of experiments. In four cells, ketamine at  $10^{-4}$  M decreased  $I_{Ca}$  to  $89.2 \pm 10.8\%$  of control. The inhibitory effect of ketamine on  $I_{Ca}$  in rat ventricular cells seems to be less than that in guinea pig cells, although the difference was not statistically significant.

#### INFLUENCE OF 4-AMINOPYRIDINE ON INOTROPIC RESPONSE OF RAT LEFT ATRIUM TO KETAMINE

4-AP at a concentration of 2 mM increased the force of contraction in rat left atria (fig. 6). After pretreatment with 4-AP, ketamine failed to increase the force of contraction any longer. Instead of the positive inotropic effect, ketamine at  $3 \times 10^{-4}$  M reduced the force of contraction slightly but obviously (fig. 6A). The addition of  $\text{CaCl}_2$  (1.5 mM) was still able to increase the force of contraction

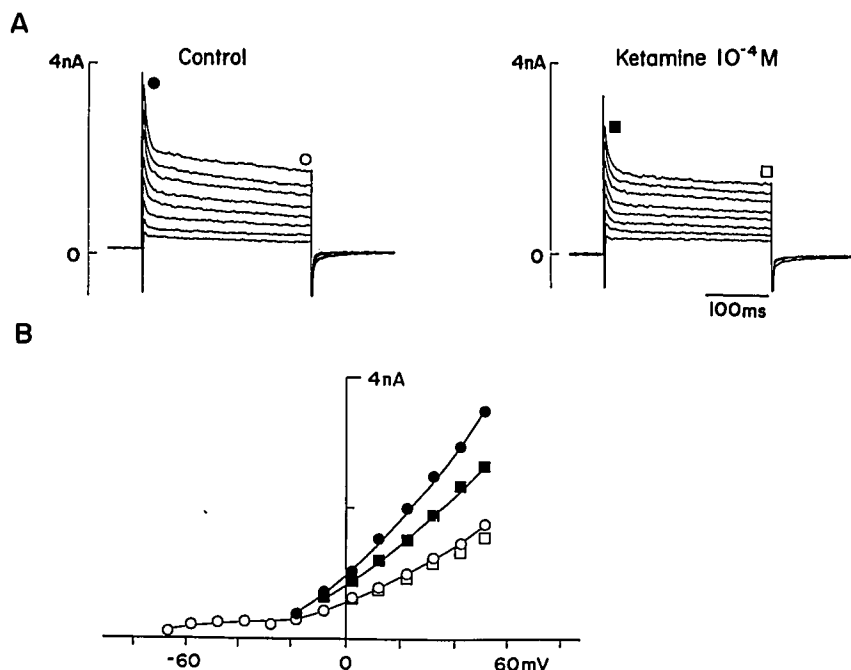

FIG. 5. Effect of ketamine on transient outward current ( $I_{to}$ ) elicited by 300-ms clamp pulses from a holding potential of  $-67$  mV in a rat single ventricular cell. A: Representative family of current traces of  $I_{to}$  elicited by voltage-clamp pulses from  $-17$  to  $+53$  mV in 10-mV steps in the absence and presence of ketamine at  $10^{-4}$  M. The respective peak current (●, ■) and the steady current at the end of the pulse (○, □) were measured, and current-voltage relationships are depicted in B.

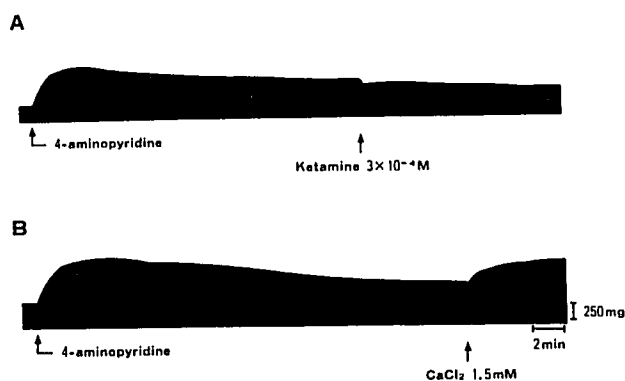

### Rat Left Atrium

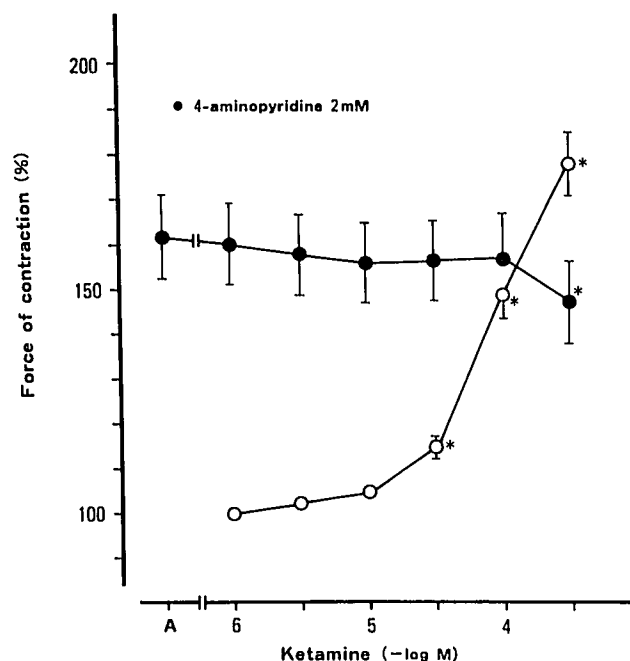

FIG. 6. Influence of 2 mM 4-AP on the inotropic effect of ketamine in rat left atria. *Top*: Typical effects of ketamine at  $3 \times 10^{-4}$  M (A) and the addition of  $\text{CaCl}_2$  at 1.5 mM (B) on the force of contraction in the presence of 4-AP. *Bottom*: Concentration-response curves for the inotropic effect of ketamine in the absence (○) and presence (●) of 4-AP. Values after the administration of the drugs are expressed as percentages of predrug control values taken as 100%. Abscissa: A = the point where the force of contraction increased by 4-AP reached a steady level. Points are means  $\pm$  SE of five or six preparations. \* $P < 0.05$  versus the respective control values.

of rat left atrium even after the preparation was treated with 4-AP (fig. 6B). The concentration-response curves for the inotropic effect of ketamine in rat atria in the absence and presence of 4-AP is shown in figure 6 (bottom). The application of 4-AP at 2 mM increased the force of contraction by  $62 \pm 9\%$  of basal level ( $n = 4$ ), and this

increase seems to be almost similar to that induced by ketamine at  $3 \times 10^{-4}$  M.

### INOTROPIC EFFECTS OF KETAMINE IN GUINEA PIG LEFT ATRIUM AND RAT PAPILLARY MUSCLE

We also examined inotropic effects of ketamine in guinea pig left atria and rat papillary muscles. Action potential recorded from guinea pig left atrium has an early repolarization phase, as depicted in figure 2A. 4-AP at 2 mM suppressed this early repolarization phase and prolonged  $\text{APD}_0$  by  $27.3 \pm 3.0$  ms ( $n = 4$ ), suggesting that  $\text{Ca}^{2+}$ -insensitive  $\text{I}_{\text{to}}$  is also responsible for the early repolarization phase of action potential in guinea pig left atria. Ketamine at  $3 \times 10^{-4}$  M prolonged  $\text{APD}_0$  by about 10 ms in the tissues (table 1).

The concentration-response curves for the inotropic effect of ketamine in electrically driven guinea pig left atria in the absence and presence of 4-AP are shown in figure 7 (left). In the absence of 4-AP, ketamine produced a biphasic inotropic effect. Ketamine at concentrations as great as  $3 \times 10^{-5}$  M increased the force of contraction slightly ( $7 \pm 3\%$  of basal level at  $3 \times 10^{-5}$  M) and then reduced the force of contraction in a concentration-dependent manner. The force of contraction at  $3 \times 10^{-4}$  M was  $66 \pm 3\%$  of the basal level ( $n = 6$ ). The application of 4-AP at 2 mM increased the force of contraction by  $58 \pm 8\%$  of the basal level. After treatment with 4-AP, the small positive inotropic effect of ketamine disappeared, and the negative inotropic effect was obvious at concentrations of  $10^{-5}$  M and higher. Eventually, ketamine at  $3 \times 10^{-4}$  M reduced the force of contraction of guinea pig left atria pretreated with 4-AP to  $67 \pm 3\%$  of the predrug

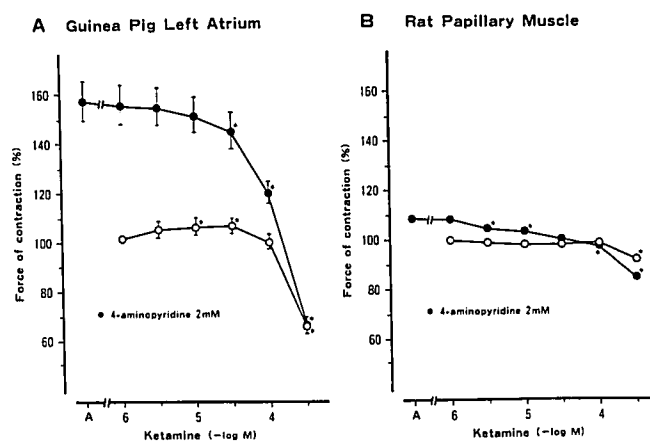

FIG. 7. Effects of ketamine on the force of contraction in guinea pig left atria (A) and rat papillary muscles (B) in the absence and presence of 2 mM 4-AP. Ordinates and abscissa are the same as in the bottom of figure 6. Points are means  $\pm$  SE of five or six preparations. \* $P < 0.05$  versus the respective control values.

basal level ( $n = 5$ ). This level was almost equal to that obtained from the untreated preparations.

In electrically driven rat papillary muscles, ketamine at concentrations as great as  $3 \times 10^{-4}$  M hardly altered the force of contraction (fig. 7, right), although ketamine increased the APD significantly (table 1). The positive inotropic effect of 4-AP was also small ( $9 \pm 1\%$  of the basal level;  $n = 4$ ) in contrast to the effects in rat left atria and guinea pig left atria. However, in the presence of the ATP-sensitive  $K^+$  channel opener pinacidil at a concentration of  $3 \times 10^{-4}$  M, which decreased the force of contraction and  $APD_0$  to  $66 \pm 6\%$  ( $n = 4$ ) and  $74 \pm 5\%$  ( $n = 3$ ) of the basal level, respectively, ketamine ( $10^{-4}$  M) and 4-AP (2 mM) clearly produced an increase in the force of contraction ( $9.5 \pm 0.3\%$  ( $n = 4$ ) and  $58.4 \pm 3.5\%$  ( $n = 4$ ) of the predrug level, respectively). The positive inotropic effect of ketamine observed in the presence of pinacidil was completely abolished by pretreatment with 4-AP.

### Discussion

In the present study we showed that the establishment of a positive and negative inotropic effect of ketamine is completely dependent on the species and cardiac tissues studied. These diverse effects of ketamine on contractility could be explained by the consistent suppression by ketamine of the transmembrane ionic currents that contribute to the constitution of normal action potential. In other words, the species and tissue differences in membrane ionic current systems seem to play a crucial role in determining the inotropic effects of ketamine.

In mammalian hearts, the normal action potential is composed primarily of five ionic currents: two inward currents (the  $Na^+$  current [ $I_{Na}$ ] and  $I_{Ca}$ ) and three outward currents ( $I_{to}$ ,  $I_K$ , and  $I_{Krect}$ ),<sup>14,21</sup> although pump and transporter currents ( $Na^+$ -pump current and  $Na^+$ - $Ca^{2+}$  exchange current) have been also suggested to contribute to the constitution of action potential.<sup>22,23</sup> Briefly,  $I_K$  plays a crucial role in repolarization of the ventricular cells and in pacemaker activity in sinoatrial cells.<sup>14</sup> In contrast,  $I_{Krect}$  plays an important role in generating the resting membrane potential and in modulating the final repolarization phase of the action potentials<sup>16</sup> in ventricular and atrial cells. The differences in action potential configurations among a variety of myocardial tissues, as shown in figure 2A, are believed to originate from the different contributions of these currents to the action potentials.<sup>14</sup> Among the four tissues used in this study, guinea pig papillary muscle is quite different from the other three cardiac tissues in its lack of the early repolarization phase of action potentials. The early repolarization phase is believed to result mainly from the activation of  $Ca^{2+}$ -insensitive  $I_{to}$ ,<sup>16-18</sup> suggesting the least contribution, if any, of this

current to the action potential in guinea pig papillary muscles. Indeed, to our best knowledge, there is no direct evidence of the existence of this current in guinea pig ventricular cells.

Ketamine exerted various influences on the action potential configurations of the tissues used in this study. First, ketamine depressed the maximum rate of rise ( $\dot{V}_{max}$ ), an approximate index of  $I_{Na}$ <sup>20</sup> in all tissues examined. Although the modest depolarization of resting membrane potential by ketamine as mentioned below could in part explain the depression of  $\dot{V}_{max}$  because of the increase in inactivated sodium channels, the serious depression of  $\dot{V}_{max}$  might indicate the direct inhibitory effect of ketamine on sodium channels. This inhibitory effect of ketamine on sodium channels might, at least in part, be involved in the antiarrhythmic effect of ketamine.<sup>1,24</sup> Second, in rat left atria and papillary muscles and in guinea pig left atria, ketamine prolonged the  $APD_0$  and the APD at the  $-40$ -mV ( $APD_{-40}$ ) and  $-70$ -mV levels ( $APD_{-70}$ ). In contrast, ketamine shortened  $APD_0$  and  $APD_{-40}$  in guinea pig papillary muscles. Lastly, the resting membrane potential also was decreased in all of these preparations. These observations suggest that ketamine might affect not only the inward current during the plateau phase, *i.e.*,  $I_{Ca}$ , but also outward current(s) in cardiac tissues.

Support for these speculations derived from the whole-cell voltage clamp experiments. In guinea pig single ventricular cells, ketamine suppressed  $I_{Ca}$ . In addition, ketamine inhibited the two outward  $K^+$  currents,  $I_{Krect}$  and  $I_K$ . Because  $Ca^{2+}$  influx through  $Ca^{2+}$  channels is one of the most important factors in the maintenance of the force of contraction in mammalian hearts,<sup>25</sup> the negative inotropic effect of ketamine observed in guinea pig papillary muscle might be causally related to the decrease in  $I_{Ca}$ .

The present observations that ketamine increased the force of contraction and prolonged the APD in rat left atria are consistent with the report of Barrigon *et al.*<sup>10</sup> They also demonstrated that ketamine increased  $^{45}Ca$  uptake and  $^{45}Ca$  efflux, suggesting that ketamine inhibits  $Ca^{2+}$  sequestration by sarcoplasmic reticulum, and that the positive inotropic effect of ketamine was antagonized by verapamil. However, because ketamine was found to suppress  $I_{Ca}$  in guinea pig and rat ventricular cells, it is highly unlikely that ketamine activated directly the voltage-dependent  $Ca^{2+}$  channel in rat atrial cells. It has been shown that enforced prolongation of depolarizing pulse duration of voltage clamp in multicellular or single cellular preparations results in the increase in the force of contraction.<sup>19,20</sup> An increase or decrease in depolarizing pulse duration would indirectly affect  $Ca^{2+}$  influx through activated  $Ca^{2+}$  channels in opposite direction by changing allowable time for  $I_{Ca}$  to flow. Indeed, the shortening of APD induced by an increased outward  $K^+$  current is believed to be the underlying mechanism of muscarinic re-



ceptor-mediated negative inotropic effect in mammalian atrial tissues<sup>26</sup> and the underlying mechanism of the K<sup>+</sup> channel opener-induced negative one.<sup>27</sup> The prolongation of APD resulting from suppression of I<sub>to</sub> would then be responsible at least in part for the  $\alpha_1$ -adrenoceptor-mediated positive inotropic effect in rat ventricle.<sup>11</sup> Therefore, the prolongation of APD at about the 0-mV level resulting presumably from the suppression of outward current(s) might be responsible for the positive inotropic effect of ketamine in rat atria. In fact, the time course of the positive inotropic response of rat left atria to ketamine was identical to the time course of the prolongation of APD<sub>0</sub>. Although we did not examine this directly using rat atrial cells, the finding that ketamine suppressed I<sub>to</sub> elicited in rat ventricular cells strongly suggests that the prolongation of APD<sub>0</sub> could result from the inhibitory effect of ketamine on I<sub>to</sub> in rat left atria. Supporting this concept is the observation that the specific inhibitor of Ca<sup>2+</sup>-insensitive I<sub>to</sub> 4-AP counteracted the positive inotropic effect of ketamine specifically.

The present study showed that 4-AP prolonged APD<sub>0</sub> and increased the force of contraction in guinea pig left atria. Although these data cannot readily be reconciled with the finding by Hume *et al.*<sup>28</sup> that the action potential of guinea pig atrial cell was unaltered by 4-AP, we interpret the present data to indicate the existence of Ca<sup>2+</sup>-insensitive I<sub>to</sub> in guinea pig left atrial cells. Thus, the ketamine-induced prolongation of APD<sub>0</sub> appears to be due to the inhibition of Ca<sup>2+</sup>-insensitive I<sub>to</sub>. However, we failed to observe any obvious positive inotropic response to ketamine. This may be explained by the idea that the net inotropic response can be expressed as the sum of the positive inotropic effect induced by suppression of I<sub>to</sub> and the negative one by suppression of I<sub>Ca</sub>.

The interpretation of the results in rat papillary muscles is more complicated. It should be noted that the application of 4-AP only slightly increased the force of contraction in this tissue despite the presence of I<sub>to</sub>. It has been shown that the time course of inactivation of I<sub>Ca</sub> in rat cardiac cells is much faster than that in guinea pig cardiac cells and that the calculated time constants for inactivation of I<sub>Ca</sub> are about 30 ms in rat cardiac cells and 150 ms in guinea pig ones.<sup>29-31</sup> As listed in table 1, APD<sub>0</sub> in rat left atria was about 7 ms and in rat papillary muscles was about 19 ms. The differences in APD between two tissues of rats might indicate that in rat ventricular cells, the inactivation of I<sub>Ca</sub> contributes to the repolarization process of the action potential, whereas in rat atrial cells I<sub>Ca</sub> is terminated by initiation of repolarization, which in turn is induced by outward currents. Therefore, the prolongation of APD induced by suppression of I<sub>to</sub> could increase Ca<sup>2+</sup> influx through Ca<sup>2+</sup> channels in rat left atria, resulting in the increase in force of contraction.

In rat papillary muscles, however, a substantial part of

Ca<sup>2+</sup> channels would be already under process of inactivation, and additional prolongation of APD might not contribute to increase the force of contraction effectively. In order to test this possibility indirectly, we conducted additional experiments using the ATP-sensitive K<sup>+</sup> channel opener pinacidil as a pharmacologic tool. The drug is known to shorten APD and decrease the contraction by increasing the outward current through ATP-sensitive K<sup>+</sup> channels.<sup>27,32</sup> When APD<sub>0</sub> was markedly shortened by pinacidil, 4-AP increased the force of contraction more effectively in rat papillary muscle. Furthermore, ketamine produced a positive inotropic effect more obviously in the presence of pinacidil. Thus, ketamine could increase the force of contraction in rat papillary muscle when action potential prolongation could effectively lead to an increase in Ca<sup>2+</sup> influx through Ca<sup>2+</sup> channels.

Ketamine produced a slight negative inotropic effect in rat papillary muscle at concentrations as great as  $3 \times 10^{-4}$  M even in the presence of 4-AP. This is the case in rat left atria and is in marked contrast to the case in guinea pig left atria and papillary muscles. The discrepancy seems to originate in part from the species difference in sensitivity of I<sub>Ca</sub> to ketamine and in part from the large dependence of rat myocardium on sarcoplasmic reticulum to generate the force of contraction.<sup>33</sup> These properties of rat ventricular muscles could explain the result that ketamine at concentrations as great as  $3 \times 10^{-4}$  M hardly affected the force of contraction in rat papillary muscles.

In conclusion, ketamine consistently suppresses the transsarcolemmal ionic currents that contribute to the constitution of normal action potentials in mammalian myocardial tissues. Inhibition of I<sub>Ca</sub> and I<sub>to</sub> may be responsible for the negative and positive inotropic effects of ketamine, respectively, although other potential effects of ketamine upon sarcoplasmic reticulum<sup>34</sup> and myofibrils could contribute to its inotropic responses. Thus, the species and tissue differences in inotropic response to ketamine may be based on the difference of membrane ionic currents in respective tissues. It should be noted, however, that it is difficult to extrapolate the present results to the clinical setting both because of the unphysiologic experimental conditions and because of uncertainty as to exactly what currents are present in human ventricular cells.

The authors thank Dr. Satoshi Gando for his invaluable advice and assistance in data analysis. They also wish to acknowledge Ms. Y. Yonezawa for her secretarial work.

## References

1. Dowdy EG, Kaya K: Studies of the mechanism of cardiovascular responses to CI-581. *ANESTHESIOLOGY* 29:931-943, 1968
2. Adams HR, Parker JL, Mathew BP: The influence of ketamine on inotropic and chronotropic responsiveness of heart muscle. *J Pharmacol Exp Ther* 201:171-183, 1977
3. Saegusa K, Furukawa Y, Ogiwara Y, Chiba S: Pharmacologic

- analysis of ketamine-induced cardiac actions in isolated, blood-perfused canine atria. *J Cardiovasc Pharmacol* 8:414-419, 1986
4. Urthaler F, Walker AA, James TN: Comparison of the inotropic action of morphine and ketamine studied in canine cardiac muscle. *J Thorac Cardiovasc Surg* 72:142-149, 1976
  5. Komai H, Amuzu JK, Bosscher HA, Rusy BF: Negative inotropic effect of ketamine in rabbit papillary muscle (abstract). *ANESTHESIOLOGY* 71:3A, 1989
  6. Ikemoto Y, Yatani A, Arimura H, Yoshitake J: Reduction of the slow inward current of isolated rat ventricular cells by thiamylal and halothane. *Acta Anaesthesiol Scand* 29:583-586, 1985
  7. Terrar DA, Victory JGG: Effects of halothane on membrane currents associated with contraction in single myocytes isolated from guinea-pig ventricle. *Br J Pharmacol* 94:500-508, 1988
  8. Lynch C III, Vogel S, Pratala MG, Sperelakis N: Enflurane depression of myocardial slow action potentials. *J Pharmacol Exp Ther* 222:405-409, 1982
  9. Gilat E, Rubinstein I, Binah O: Effect of sodium pentobarbital on the transmembrane action potential and the slow inward current of guinea pig ventricular myocytes. *J Cardiovasc Pharmacol* 10:485-488, 1987
  10. Barrigon S, De Miguel B, Tamargo J, Tejerina T: The mechanism of the positive inotropic action of ketamine on isolated atria of the rat. *Br J Pharmacol* 76:85-93, 1982
  11. Tohse N, Nakaya H, Hattori Y, Endou M, Kanno M: Inhibitory effect mediated by  $\alpha_1$ -adrenoceptors on transient outward current in isolated rat ventricular cells. *Pflügers Arch* 415:575-581, 1990
  12. Isenberg G, Klockner U: Calcium tolerant ventricular myocytes prepared by preincubation in a "KB medium." *Pflügers Arch* 395:6-18, 1982
  13. Hamill OP, Marty A, Neher E, Sakmann B, Sigworth FJ: Improved patch-clamp techniques for high-resolution current recording from cells and cell-free membrane patches. *Pflügers Arch* 391:85-100, 1981
  14. Kass RS: The ionic basis of electrical activity in the heart, Physiology and Pathophysiology of The Heart. Edited by Sperelakis N. Boston, Martinus Nijhoff Publishing, 1984, pp 83-96
  15. Josephson IR, Sanchez-Chapula J, Brown AM: Early outward current in rat single ventricular cells. *Circ Res* 54:157-162, 1984
  16. Giles WR, Imaizumi Y: Comparison of potassium currents in rabbit atrial and ventricular cells. *J Physiol (Lond)* 405:123-145, 1988
  17. Tseng GN, Hoffman BF: Two components of transient outward current in canine ventricular myocytes. *Circ Res* 64:633-647, 1989
  18. Shibata EF, Drury T, Refsum H, Aldrete V, Giles W: Contributions of a transient outward current to repolarization in human atrium. *Am J Physiol* H1773-H1781, 1989
  19. Morad M, Trautwein W: The effect of the duration of the action potential on contraction in the mammalian heart muscle. *Pflügers Arch* 299:66-82, 1968
  20. Boyett MR, Kirby MS, Orchard CH, Roberts A: The negative inotropic effect of acetylcholine on ferret ventricular myocardium. *J Physiol (Lond)* 404:613-635, 1988
  21. Coraboeuf E: Ionic basis of electrical activity in cardiac tissues. *Am J Physiol* 234:H101-H116, 1978
  22. Daut J, Rüdel R: The electrogenic sodium pump in guinea-pig ventricular muscle: Inhibition of pump current by cardiac glycosides. *J Physiol (Lond)* 330:243-264, 1982
  23. Egan TM, Noble D, Noble SJ, Powell T, Spindler AJ, Twist VW.: Sodium-calcium exchange during the action potential in guinea pig ventricular cells. *J Physiol (Lond)* 411:639-661, 1989
  24. Goldberg AH, Keane PW, Phear WPC: Effects of ketamine on contractile performance and excitability of isolated heart muscle. *J Pharmacol Exp Ther* 175:388-394, 1970
  25. Morad M, Cleemann L: Role of  $Ca^{2+}$  channel in development of tension in heart muscle. *J Mol Cell Cardiol* 19:527-553, 1987
  26. Ten Eick R, Nawrath H, McDonald TF, Trautwein W: On the mechanism of the negative inotropic effect of acetylcholine. *Pflügers Arch* 361:207-213, 1976
  27. Yanagisawa T, Hashimoto H, Taira N: Interaction of potassium channel openers and blockers in canine atrial muscle. *Br J Pharmacol* 97:753-762, 1989
  28. Hume JR, Uehara A, Hadley RW, Harvey RD: Comparison of  $K^+$  channels in mammalian atrial and ventricular myocytes, Potassium Channels: Basic Function and Therapeutic Aspects. Edited by Colatsky TJ. New York, Wiley-Liss, 1990, pp 17-41
  29. Josephson IR, Sanchez-Chapula J, Brown AM: A comparison of calcium currents in rat and guinea pig single ventricular cells. *Circ Res* 54:144-156, 1984
  30. Hume JR, Uehara A: Ionic basis of the different action potential configurations of single guinea-pig atrial and ventricular myocytes. *J Physiol (Lond)* 368:525-544, 1985
  31. Cohen NM, Lederer WJ: Changes in the calcium current of rat heart ventricular myocytes during development. *J Physiol (Lond)* 406:115-146, 1988
  32. Arena JP, Kass RS: Enhancement of potassium-sensitive current in heart cells by pinacidil: Evidence for modulation of the ATP-sensitive potassium channel. *Circ Res* 65:436-445, 1989
  33. Lynch C III, Frazer MJ: Depressant effects of volatile anesthetics upon rat and amphibian ventricular myocardium: Insights into anesthetic mechanisms of action. *ANESTHESIOLOGY* 70:511-522, 1989
  34. Riou B, Lecarpentier Y, Viars P: Inotropic effect of ketamine on rat cardiac papillary muscle. *ANESTHESIOLOGY* 71:116-125, 1989
